# Supplementary material
Source: PubMed Central journal article supplement (PMC2785738)

## Supplementary data

### S1 RT-PCR analysis in GV oocytes of genes associated with P-bodies

The cDNA products were ran on 2% agarose gel. The name and expected sizes (in parentheses) of the PCR products are as follows: *dcp1a* (228 bp ), *rap55* (151 bp ), *rck/p54* (161 bp ), *cpeb-1* (233 bp), *eIF4-ET* (237 bp); and the housekeeping gene, *gapdh* (540bp). The primers used and Pubmed accession numbers are shown in the table below:

| Gene           | Pubmed Number  | Forward              | Reverse               | products size |
|----------------|----------------|----------------------|-----------------------|---------------|
| <i>dcp1a</i>   | NM_133761      | tccaaccctccagtctatgc | tctgctgtccaacagtggag  | 228 bp        |
| <i>p54/rck</i> | NM_007841      | caaaaagtgcactgcctcaa | cgatgttcctgcctcatttt  | 151 bp        |
| <i>Cpeb-1</i>  | NM_007755      | tggctgacagcaactttgtc | agcggtgactgctttcagat  | 161 bp        |
| <i>rap55</i>   | BC031521       | tacatcggcagcaagatcag | gcggtattggacgatctggt  | 233 bp        |
| <i>4-ET</i>    | BC033410       | tcccagaccagccgttatac | agcttggagcaaacttgaa   | 237 bp        |
| <i>Gapdh</i>   | XM_001473623.1 | gacccttcattgacctcac  | gatgaccttgcccacagcctt | 540 bp        |

### S2 Large EGFP-hDcp1a granules are not MTOCs.

**A)** Time-lapse sequence, taken by confocal microscopy, of the same GV oocyte injected with EGFP-hDcp1a undergoing maturation; at  $t = 0$ , no foci are visible in the GV oocyte; at  $t = 80$ mins, two large foci appear near to the spindle (shown with red and yellow arrows); between  $t = 160$  and  $320$ mins, the foci tend to follow the spindle; at  $t = 400$ , the foci are very motile, one foci (red arrow) has migrated to the cortex. **B)** Refer to **movie 1**. A time-lapse movie based on the 3-D reconstruction for the confocal stacks of the GV oocyte in **(A)**; pictures were taken over 16 hours ( $\Delta t = 15$  mins). The film reveals the high mobility of the foci in the whole 3-D oocyte; the outline of the oocyte is depicted in blue and the EGFP-hDcp1a foci in red. **C-G)** Immunocytochemistry for  $\beta$ -tubulin and  $\gamma$ -tubulin on EGFP-hDcp1a injected oocytes. **C)** EGFP-hDcp1a expression alone; **D)**  $\beta$ -tubulin immunofluorescence alone, the micro-tubule network can be seen. **E)**  $\gamma$ -tubulin immunofluorescence alone, staining is shown with an arrow. **G)** overlay of C-E images showing that the EGFP-hDcp1a foci do not co-localise with  $\gamma$ -tubulin nor with  $\beta$ -tubulin. Scale bars are 50  $\mu$ m.

### S3 De-phosphorylation of phosphorylated MAP kinase by Potato acid phosphatase activity

**A)** Western blot probing for phospho-MAP kinase protein on extracts of AML-12 cells treated with  $10^{-7}$  M insulin for 5 minutes and either treated (+phos) or non-treated ( $\Delta$ phos) with potato acid phosphatase. **B)** Western blot probing for  $\beta$ -tubulin protein on the same cell extracts as in (A).

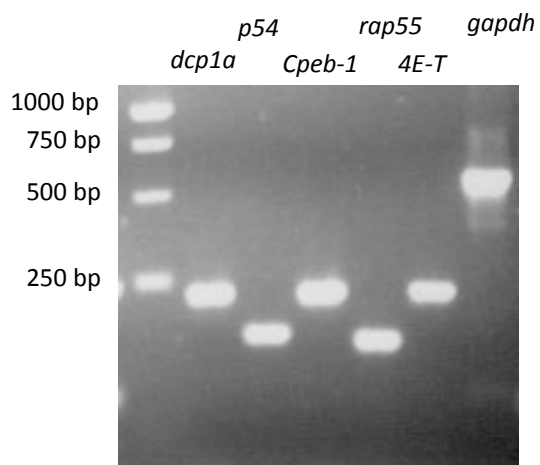

A

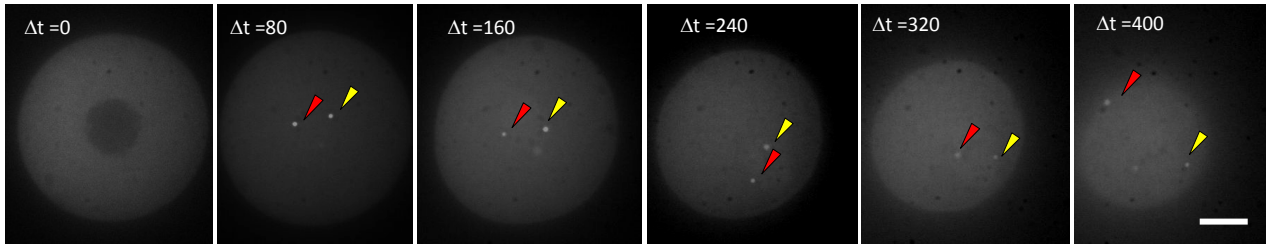

B

### Time-lapse Movie 1

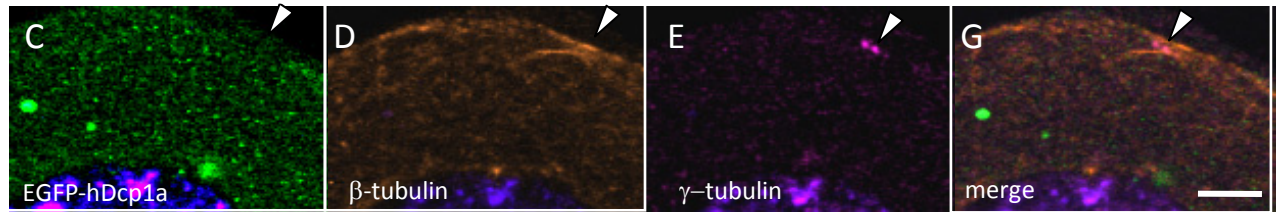

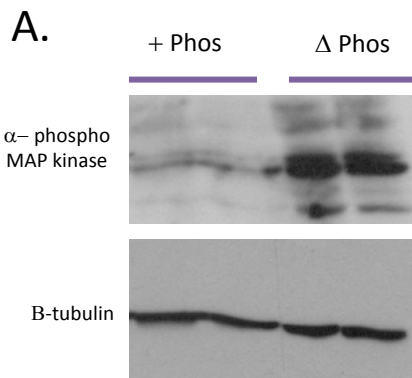

Supplement: E09-02-0123_1.pdf [file E09-02-0123_1.pdf]
